# Supplementary material for: The impact of unrestricted access to direct-acting antiviral among incarcerated hepatitis C virus-infected patients
Source: PubMed Central journal article supplement — Clin Mol Hepatol. 2021 Feb 19;27(3):474–85. doi: 10.3350/cmh.2021.0015 (PMC8273645; doi:10.3350/cmh.2021.0015), 2021-02-19
Supplement: cmh-2021-0015-suppl1.pdf [file cmh-2021-0015-suppl1.pdf]

**Supplementary Table 1.** Reasons of incomplete HCV treatment

| Incomplete treatment (n=27) | Value   |
|-----------------------------|---------|
| Side effect of PR           | 17 (62) |
| Treatment failure           | 4 (15)  |
| Early released              | 4 (15)  |
| Hepatic decompensation      | 1 (4)   |
| Death during treatment      | 1 (4)   |

Values are presented as number (%).  
PR, pegylated interferon and ribavirin.
