# Supplementary material for: The impact of unrestricted access to direct-acting antiviral among incarcerated hepatitis C virus-infected patients
Source: PubMed Central journal article supplement — Clin Mol Hepatol. 2021 Feb 19;27(3):474–85. doi: 10.3350/cmh.2021.0015 (PMC8273645; doi:10.3350/cmh.2021.0015), 2021-02-19
Supplement: cmh-2021-0015-suppl2.pdf [file cmh-2021-0015-suppl2.pdf]

**Supplementary Table 2.** Types of treatment during restricted and unrestricted DAA era

| Types of treatment                            | Value      |
|-----------------------------------------------|------------|
| Restricted DAA era (n=320)                    |            |
| Pegylated interferon + ribavirin              | 185 (57.8) |
| Ombitasvir/paritaprevir/ritonavir ± ribavirin | 66 (20.6)  |
| Sofosbuvir daclatasvir + ribavirin            | 42 (13.1)  |
| Sofosbuvir/velpatasvir ± ribavirin            | 20 (6.3)   |
| Sofosbuvir/ledipasvir ± ribavirin             | 4 (1.3)    |
| Glecaprevir/pibrentasvir                      | 1 (0.3)    |
| Sofosbuvir + pegylated interferon + ribavirin | 2 (0.6)    |
| Unrestricted DAA era (n=681)                  |            |
| Pegylated interferon + ribavirin              | 34 (4.7)   |
| Ombitasvir/paritaprevir/ritonavir ± ribavirin | 3 (0.4)    |
| Sofosbuvir/velpatasvir ± ribavirin            | 643 (94.4) |
| Sofosbuvir/ledipasvir ± ribavirin             | 1 (0.5)    |

Values are presented as number (%).  
DAA, direct acting antiviral.
