# Supplementary material for: The impact of unrestricted access to direct-acting antiviral among incarcerated hepatitis C virus-infected patients
Source: PubMed Central journal article supplement — Clin Mol Hepatol. 2021 Feb 19;27(3):474–85. doi: 10.3350/cmh.2021.0015 (PMC8273645; doi:10.3350/cmh.2021.0015), 2021-02-19
Supplement: cmh-2021-0015-suppl3.pdf [file cmh-2021-0015-suppl3.pdf]

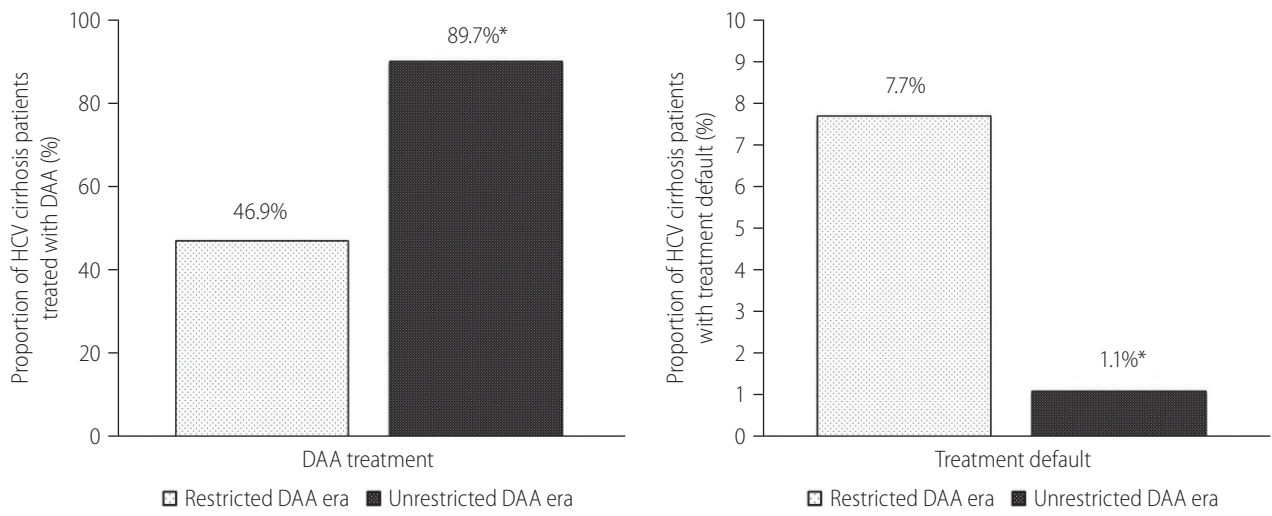

**Supplementary Figure 1.** Treatment outcome among incarcerated HCV patients with liver cirrhosis. DAA, direct-acting antivirals. \* $P < 0.05$  between restricted DAA and unrestricted DAA era.
